# Supplementary material
Source: ML conference proceedings conference paper supplement (https://proceedings.neurips.cc/paper_files/paper/2019/hash/475fbefa9ebfba9233364533aafd02a3-Abstract.html)
Supplement: Supplementary file [file 475fbefa9ebfba9233364533aafd02a3-Supplemental.zip]

## A Slow Caratheodory Implementation

---

**Algorithm 8** CARATHEODORY( $P, u$ )

---

**Input :** A weighted set  $(P, u)$  of  $n$  points in  $\mathbb{R}^d$ .  
**Output:** A Caratheodory set  $(S, w)$  for  $(P, u)$  in  $O(n^2 d^2)$  time.

```

1 if  $n \leq d + 1$  then
2   | return  $(P, u)$ 
3 Identify  $P = \{p_1, \dots, p_n\}$ 
4 for every  $i \in \{2, \dots, n\}$  do
5   |  $a_i := p_i - p_1$ 
6  $A := (a_2 \mid \dots \mid a_n) \ // \ A \in \mathbb{R}^{d \times (n-1)}$ 
7 Compute  $v = (v_2, \dots, v_n)^T \neq 0$  such that  $Av = 0$ .

8  $v_1 := -\sum_{i=2}^n v_i$ 
9  $\alpha := \min \left\{ \frac{u_i}{v_i} \mid i \in \{1, \dots, n\} \text{ and } v_i > 0 \right\}$ 
10  $w_i := u_i - \alpha v_i$  for every  $i \in \{1, \dots, n\}$ .
11  $S := \{p_i \mid w_i > 0 \text{ and } i \in \{1, \dots, n\}\}$ 
   | if  $|S| > d + 1$  then
12   |  $(S, w) := \text{CARATHEODORY}(S, w)$ 
13 return  $(S, w)$ 

```

---

**Overview of Algorithm 8 and its correctness.** The input is a weighted set  $(P, u)$  whose points are denoted by  $P = \{p_1, \dots, p_n\}$ . We assume  $n > d + 1$ , otherwise  $(S, w) = (P, u)$  is the desired coresot. Hence, the  $n - 1 > d$  points  $p_2 - p_1, p_3 - p_1, \dots, p_n - p_1 \in \mathbb{R}^d$  must be linearly dependent. This implies that there are reals  $v_2, \dots, v_n$ , which are not all zeros, such that

$$\sum_{i=2}^n v_i (p_i - p_1) = 0. \quad (2)$$

These reals are computed in Line 7 by solving system of linear equations. This step dominates the running time of the algorithm and takes  $O(nd^2)$  time using e.g. SVD. The definition

$$v_1 = -\sum_{i=2}^n v_i \quad (3)$$

in Line 8, guarantees that

$$v_j < 0 \text{ for some } j \in [n], \quad (4)$$

and that

$$\sum_{i=1}^n v_i p_i = v_1 p_1 + \sum_{i=2}^n v_i p_i = \left( -\sum_{i=2}^n v_i \right) p_1 + \sum_{i=2}^n v_i p_i = \sum_{i=2}^n v_i (p_i - p_1) = 0, \quad (5)$$

where the second equality is by (3), and the last is by (2). Hence, for every  $\alpha \in \mathbb{R}$ , the weighted mean of  $P$  is

$$\sum_{i=1}^n u_i p_i = \sum_{i=1}^n u_i p_i - \alpha \sum_{i=1}^n v_i p_i = \sum_{i=1}^n (u_i - \alpha v_i) p_i, \quad (6)$$

where the first equality holds since  $\sum_{i=1}^n v_i p_i = 0$  by (5). The definition of  $\alpha$  in Line 9 guarantees that  $\alpha v_{i^*} = u_{i^*}$  for some  $i^* \in [n]$ , and that  $u_i - \alpha v_i \geq 0$  for every  $i \in [n]$ . Hence, the set  $S$  that is defined in Line 11 contains at most  $n - 1$  points, and its set of weights  $\{u_i - \alpha v_i\}$  is non-negative. Notice that if  $\alpha = 0$ , we have that  $w_j = u_j > 0$  for some  $j \in [n]$ . Otherwise, if  $\alpha > 0$ , by (4) there is  $j \in [n]$  such that  $v_j < 0$ , which yields that  $w_j = u_j - \alpha v_j > 0$ . Hence, in both cases there is  $w_j > 0$  for some  $j \in [n]$ . Therefore,  $|S| \neq \emptyset$ .

The sum of the positive weights is thus the total sum of weights,

$$\sum_{p_i \in S} w_i = \sum_{i=1}^n (u_i - \alpha v_i) = \sum_{i=1}^n u_i - \alpha \cdot \sum_{i=1}^n v_i = 1,$$

where the last equality hold by (3), and since  $u$  sums to 1. This and (6) proves that  $(S, w)$  is a Caratheodory set of size  $n - 1$  for  $(P, u)$ ; see Definition 2.1. In Line 12 we repeat this process recursively until there are at most  $d + 1$  points left in  $S$ . For  $O(n)$  iterations, the overall time is thus  $O(n^2 d^2)$ .

## B Faster Caratheodory Set

**Theorem B.1** (Theorem 3.1). *Let  $(P, u)$  be a weighted set of  $n$  points in  $\mathbb{R}^d$  such that  $\sum_{p \in P} u(p) = 1$ , and  $k \geq d + 2$  be an integer. Let  $(C, w)$  be the output of a call to FAST-CARATHEODORY-SET( $P, u, k$ ); See Algorithm 1. Let  $t(k, d)$  be the time it takes to compute a Caratheodory Set for  $k$  points in  $\mathbb{R}^d$ , as in Theorem 2.2. Then  $(C, w)$  is a Caratheodory set of  $(P, u)$  that is computed in time*

$$O\left(nd + t(k, d) \cdot \frac{\log n}{\log(k/d)}\right).$$

*Proof.* We use the notation and variable names as defined in Algorithm 1 from Section 3.

First, at Line 1 we remove all the points in  $P$  which have zero weight, since they do not contribute to the weighted sum. Therefore, we now assume that  $u(p) > 0$  for every  $p \in P$  and that  $|P| = n$ . Identify the input set  $P = \{p_1, \dots, p_n\}$  and the set  $C$  that is computed at Line 9 of Algorithm 1 as  $C = \{c_1, \dots, c_{|C|}\}$ . We will first prove that the weighted set  $(C, w)$  that is computed in Lines 9–11 at an arbitrary iteration is a Caratheodory set for  $(P, u)$ , i.e.,  $\sum_{p \in P} u(p) \cdot p = \sum_{p \in C} w(p) \cdot p$ ,  $\sum_{p \in P} u(p) = \sum_{p \in C} w(p)$  and  $|C| \leq (d + 1) \cdot \lceil \frac{n}{k} \rceil$ .

Let  $(\tilde{\mu}, \tilde{w})$  be the pair that is computed during the execution the current iteration at Line 8. By Theorem 2.2 and Algorithm 8, the pair  $(\tilde{\mu}, \tilde{w})$  is a Caratheodory set of the weighted set  $(\{\mu_1, \dots, \mu_k\}, u')$ . Hence,

$$\sum_{\mu_i \in \tilde{\mu}} \tilde{w}(\mu_i) = 1, \quad \sum_{\mu_i \in \tilde{\mu}} \tilde{w}(\mu_i) \mu_i = \sum_{i=1}^k u'(\mu_i) \cdot \mu_i \text{ and } |\tilde{\mu}| \leq d + 1. \quad (7)$$

By the definition of  $\mu_i$ , for every  $i \in \{1, \dots, k\}$

$$\sum_{i=1}^k u'(\mu_i) \cdot \mu_i = \sum_{i=1}^k u'(\mu_i) \cdot \left( \frac{1}{u'(\mu_i)} \cdot \sum_{p \in P_i} u(p) \cdot p \right) = \sum_{i=1}^k \sum_{p \in P_i} u(p) p = \sum_{p \in P} u(p) p. \quad (8)$$

We now have that

$$\begin{aligned} \sum_{p \in C} w(p) p &= \sum_{\mu_i \in \tilde{\mu}} \sum_{p \in P_i} \frac{\tilde{w}(\mu_i) u(p)}{u'(\mu_i)} \cdot p = \sum_{\mu_i \in \tilde{\mu}} \tilde{w}(\mu_i) \sum_{p \in P_i} \frac{u(p)}{u'(\mu_i)} p = \sum_{\mu_i \in \tilde{\mu}} \tilde{w}(\mu_i) \mu_i \\ &= \sum_{i=1}^k u'(\mu_i) \cdot \mu_i = \sum_{p \in P} u(p) p, \end{aligned} \quad (9)$$

where the first equality holds by the definitions of  $C$  and  $w$ , the third equality holds by the definition of  $\mu_i$  at Line 5, the fourth equality is by (7), and the last equality is by (8).

The new sum of weights is equal to

$$\sum_{p \in C} w(p) = \sum_{\mu_i \in \tilde{\mu}} \sum_{p \in P_i} \frac{\tilde{w}(\mu_i) u(p)}{u'(\mu_i)} = \sum_{\mu_i \in \tilde{\mu}} \frac{\tilde{w}(\mu_i)}{u'(\mu_i)} \cdot \sum_{p \in P_i} u(p) = \sum_{\mu_i \in \tilde{\mu}} \frac{\tilde{w}(\mu_i)}{u'(\mu_i)} \cdot u'(\mu_i) = \sum_{\mu_i \in \tilde{\mu}} \tilde{w}(\mu_i) = 1, \quad (10)$$

where the last equality is by (7).

Combining (9) and (10) yields that the weighted  $(C, w)$  computed before the recursive call at Line 13 of the algorithm is a Caratheodory set for the weighted input set  $(P, u)$ . Since at each iteration we either return such a Caratheodory set  $(C, w)$  at Line 13 or return the input weighted set  $(P, u)$  itself at Line 3, by induction we conclude that the output weighted set of a call to FAST-CARATHEODORY-SET( $P, u, k$ ) is a Caratheodory set for the original input  $(P, u)$ .

By (7) we have that  $C$  contains at most  $(d + 1)$  clusters from  $P$  and at most  $|C| \leq (d + 1) \cdot \lceil \frac{n}{k} \rceil$  points. Hence, there are at most  $\log_{\frac{k}{d+1}}(n)$  recursive calls before the stopping condition in line 2 is satisfied. The time complexity of each iteration is  $n' + t(k, d)$  where  $n' = |P| \cdot d$  is the number of points in the current iteration. Thus the total running time of Algorithm 1 is

$$\sum_{i=1}^{\log_{\frac{k}{d+1}}(n)} \left( \frac{nd}{2^{i-1}} + t(k, d) \right) \leq 2nd + \log_{\frac{k}{d+1}}(n) \cdot t(k, d) \in O \left( nd + \frac{\log n}{\log(k/(d+1))} \cdot t(k, d) \right).$$

□

**Theorem B.2** (Theorem 3.2). *Let  $A \in \mathbb{R}^{n \times d}$  be a matrix, and  $k \geq d^2 + 2$  be an integer. Let  $S \in \mathbb{R}^{(d^2+1) \times d}$  be the output of a call to CARATHEODORY-MATRIX( $A, k$ ); see Algorithm 2. Let  $t(k, d)$  be the computation time of CARATHEODORY given  $k$  point in  $\mathbb{R}^{d^2}$ . Then  $S$  satisfies that  $A^T A = S^T S$ . Furthermore,  $S$  can be computed in  $O(nd^2 + t(k, d^2) \cdot \frac{\log n}{\log(k/d^2)})$  time.*

*Proof.* We use the notation and variable names as defined in Algorithm 2 from Section 3.

Since  $(C, w)$  at Line 5 of Algorithm 2 is the output of a call to FAST-CARATHEODORY-SET( $P, u, k$ ), by Theorem 3.1 we have that: (i) the weighted means of  $(C, w)$  and  $(P, u)$  are equal, i.e.,

$$\sum_{p \in P} u(p) \cdot p = \sum_{p \in C} w(p) \cdot p, \quad (11)$$

(ii)  $|C| \leq d^2 + 1$  since  $P \subseteq \mathbb{R}^{(d^2)}$ , and (iii)  $C$  is computed in  $O(nd^2 + \log_{\frac{k}{d^2+1}}(n) \cdot t(k, d^2))$  time.

Combining (11) with the fact that  $p_i$  is simply the concatenation of the entries of  $a_i a_i^T$ , we have that

$$\sum_{p_i \in P} u(p_i) a_i a_i^T = \sum_{p_i \in C} w(p_i) \cdot a_i a_i^T. \quad (12)$$

By the definition of  $S$  in Line 6, we have that

$$S^T S = \sum_{p_i \in C} (\sqrt{n \cdot w(p_i)} \cdot a_i) (\sqrt{n \cdot w(p_i)} \cdot a_i)^T = n \cdot \sum_{p_i \in C} w(p_i) \cdot a_i a_i^T. \quad (13)$$

We also have that

$$A^T A = \sum_{i=1}^n a_i a_i^T = n \cdot \sum_{p_i \in P} (1/n) a_i a_i^T = n \cdot \sum_{p_i \in P} u(p_i) a_i a_i^T, \quad (14)$$

where the second derivation holds since  $u \equiv 1/n$ . Theorem 3.2 now holds by combining (12), (13) and (14) as

$$S^T S = n \cdot \sum_{p_i \in C} w(p_i) \cdot a_i a_i^T = n \cdot \sum_{p_i \in P} u(p_i) a_i a_i^T = A^T A.$$

**Running time:** Computing the weighted set  $(P, u)$  at Lines 1–4 takes  $O(nd^2)$  time, since it takes  $O(d^2)$  time to compute each of the  $n$  points in  $P$ .

By Theorem 3.1, Line 5 takes  $O(nd^2 + t(k, d^2) \cdot \frac{\log n}{\log(k/d^2)})$  to compute a CARATHEODORY for the weighted set  $(P, u)$ , and finally Line 6 takes  $O(d^3)$  for building the matrix  $S$ . Hence, the overall running time of Algorithm 2 is  $O(nd^2 + t(k, d^2) \cdot \frac{\log n}{\log(k/d^2)})$ . □
